# Supplementary material for: The impact of ionic liquids on amyloid fibrilization of Aβ16-22: tuning the rate of fibrilization using a reverse Hofmeister strategy
Source: Royal Society of Chemistry journal article supplement (doi:10.1039/c1cp22256b), 2011-01-01
Supplement: c1cp22256b.pdf [file c1cp22256b.pdf]

## Supporting Information

### The impact of ionic liquids on amyloid fibrilization of A $\beta$ 16-22: Tuning the rate of fibrilization using a reverse Hofmeister strategy

Natalie Debeljuh,<sup>a</sup> Colin J. Barrow,<sup>a</sup> and Nolene Byrne<sup>a\*</sup>  
Institute for Technology Research and Innovation, Deakin University, Geelong,  
Vic 3217.

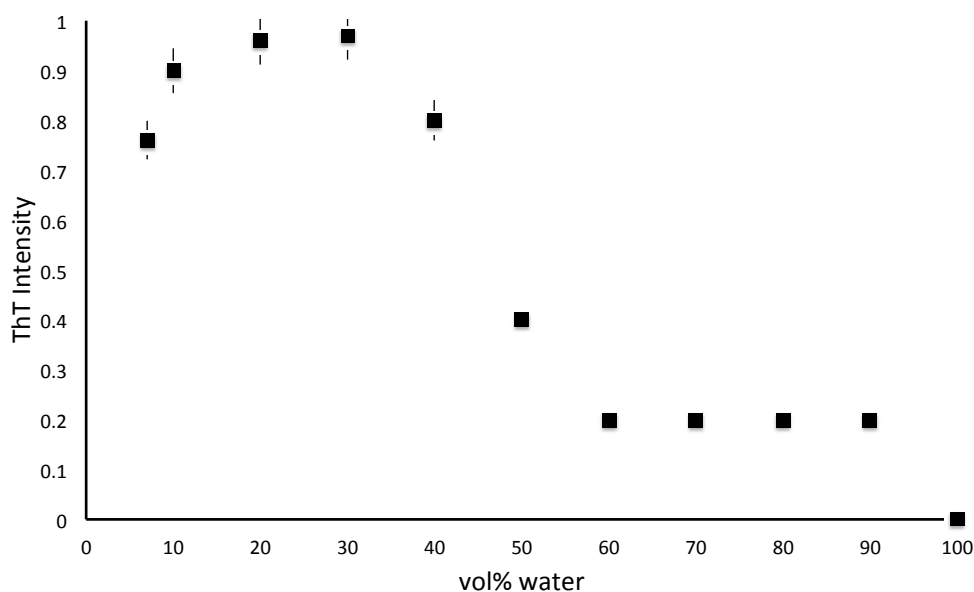

Figure 1: ThT intensity for A $\beta$ 16-22 dissolved in TeaH<sub>2</sub>PO<sub>4</sub> solutions with varying water content after 1 minute.

Included is a Movie showing the fast fibrilization of A $\beta$ 16-22 in 90%TeaH<sub>2</sub>PO<sub>4</sub>.

#### Materials and Methods

A $\beta$ 16-22 was synthesized by Fmoc solid phase chemistry using PEG-PS resin. The peptide was cleaved using 95% TFA, 3% TES and 2% water (v/v/v), and obtained in the form of a TFA salt. Peptide purity was determined by HPLC and found to be 96%, and mass spectrometry (ESI, +ve);  $m/z$  calc. (C<sub>43</sub>H<sub>64</sub>N<sub>8</sub>O<sub>10</sub>)<sup>+</sup>, 852.47; found 853.46.

Ionic liquids were prepared as previously reported<sup>1</sup>.

CD spectra were collected using a Jasco J-850 spectropolarimeter. Peptide concentration was 50  $\mu$ M. The spectra were averaged over 5 scans, and a pathlength of 1mm was used.

ThT was performed using a Varian Cary Eclipse Fluorescence Spectrophotometer. Peptide concentration was 2mg/ml and ThT concentration was 0.5mg/ml. pILs with 0.5mg/mL ThT were used as controls and data points were collected at 482nm over 3 accumulations and from 3 sample sets. ThT was added to the sample at each time increment prior to measuring the ThT intensity

TEM images were taken using a Jeol 210 microscope accelerating voltage was 100kV, grids were staining using 2% uranyl acetate.

#### Reference

1. Belieres, J.-P.; Angell, C. A. *J Phys Chem B* 2007, **111**, 4926-4937
